# Supplementary material
Source: PubMed Central journal article supplement (PMC3457104)
Supplement: AEM.01325-12_zam999103757so1.pdf [file AEM.01325-12_zam999103757so1.pdf]

1 **Supplementary methods**

2 **Denaturing Gradient Gel Electrophoresis (DGGE)**

3 Chromosomal DNA of the soil samples was extracted using the PowerSoil DNA Isolation Kit  
4 (MoBio) following the protocol of the manufacturer. For DGGE, ~370 bp-long fragments  
5 were amplified using primers 31F and 341R (5'-CTGCTGCCTCCCGTAGG-3', with a GC  
6 clamp added at its 5' end (1), and analyzed as previously reported (2). DGGE band patterns  
7 were compared using the program package GelCompar II (Applied Maths NV, Sint-Martens-  
8 Latem, Belgium). For subsequent sequencing, DNA bands were excised and eluted in 25 µl  
9 of 10 mM Tris-HCl buffer (pH 8.0) for 1 hour at 37°C, reamplified using the corresponding  
10 primers without GC clamp and sequenced. Some DGGE bands contained multiple 16S rRNA  
11 gene sequences which were first separated by cloning (see above), then 8 randomly selected  
12 clones with different inserts were sequenced.

13  
14  
15

Reference List

- 16 1. **Muyzer G, Dewaal EC, Uitterlinden AG.** 1993. Profiling of Complex Microbial-  
17 Populations by Denaturing Gradient Gel-Electrophoresis Analysis of Polymerase Chain  
18 Reaction-Amplified Genes-Coding for 16S Ribosomal-Rna. *Appl. Environ. Microbiol.*  
19 **59:695-700.**
- 20 2. **Zul D, Denzel S, Kotz A, Overmann J.** 2007. Effects of plant biomass, plant diversity,  
21 and water content on bacterial communities in soil lysimeters: Implications for the  
22 determinants of bacterial diversity. *Appl. Environ. Microbiol.* **73:6916-6929.**
- 23  
24

25

1 **Supplementary Table 1.** General information on the three regions and mean ( $\pm$  standard  
2 deviation) of soil and site parameters for all grassland and forest plots in each region. Naming  
3 corresponds to all grassland plots of Schwäbische Alb (AEG), Hainich (HEG), Schorfheide-  
4 Chorin (SEG) or all forest plots of Schwäbische Alb (AEW), Hainich (HEW) and  
5 Schorfheide-Chorin (SEW).

|                                                                          | Alb                                 |                                | Hainich                              |                                | Schorfheide                          |                                |
|--------------------------------------------------------------------------|-------------------------------------|--------------------------------|--------------------------------------|--------------------------------|--------------------------------------|--------------------------------|
| Latitude                                                                 | 48° 20' 60.0'' –<br>48° 32' 3.7'' N |                                | 50° 56' 14.5'' –<br>51° 22' 43.4'' N |                                | 52° 47' 24.8'' –<br>53° 13' 26.0'' N |                                |
| Longitude                                                                | 9° 12' 13.0'' – 9°<br>34' 48.9'' E  |                                | 10° 10' 24.0'' –<br>10° 46' 45.0'' E |                                | 13° 23' 27'' – 14°<br>8' 52.7'' E    |                                |
| Altitude [m above sea level]                                             | 460 - 860                           |                                | 300 - 400                            |                                | 10 -140                              |                                |
| Mean annual temperature [°C]                                             | 6.5 - 8.0                           |                                | 6.0 - 7.5                            |                                | 8.0 - 8.4                            |                                |
| Mean annual precipitation [mm]                                           | 940 - 960                           |                                | 750 - 800                            |                                | 520 - 600                            |                                |
| Soil type (predominantly)                                                | Leptosol,<br>Cambisol               |                                | Stagnosol,<br>Luvisol                |                                | Histosol,<br>Cambisol                |                                |
|                                                                          | AEG                                 | AEW                            | HEG                                  | HEW                            | SEG                                  | SEW                            |
| pH                                                                       | <b>6.49</b><br>( $\pm 0.48$ )       | <b>4.96</b><br>( $\pm 0.74$ )  | <b>7.01</b><br>( $\pm 0.18$ )        | <b>5.15</b><br>( $\pm 1.12$ )  | <b>6.85</b><br>( $\pm 0.58$ )        | <b>3.56</b><br>( $\pm 0.13$ )  |
| Corg [g kg <sup>-1</sup> ]                                               | <b>67</b><br>( $\pm 15$ )           | <b>69</b><br>( $\pm 18$ )      | <b>50.3</b><br>( $\pm 22$ )          | <b>53</b><br>( $\pm 15$ )      | <b>150</b><br>( $\pm 71$ )           | <b>25</b><br>( $\pm 6$ )       |
| Nitrogen [g kg <sup>-1</sup> ]                                           | <b>6.30</b><br>( $\pm 1.40$ )       | <b>4.87</b><br>( $\pm 1.11$ )  | <b>4.73</b><br>( $\pm 1.83$ )        | <b>3.76</b><br>( $\pm 1.27$ )  | <b>14.02</b><br>( $\pm 5.39$ )       | <b>1.42</b><br>( $\pm 0.32$ )  |
| Phosphorus [mg kg <sup>-1</sup> ]                                        | <b>1158</b><br>( $\pm 391$ )        | <b>687</b><br>( $\pm 229$ )    | <b>1113</b><br>( $\pm 395$ )         | <b>553</b><br>( $\pm 201$ )    | <b>1046</b><br>( $\pm 427$ )         | <b>252</b><br>( $\pm 93$ )     |
| Corg/Nitrogen-ratio                                                      | <b>10.59</b><br>( $\pm 0.67$ )      | <b>14.12</b><br>( $\pm 1.30$ ) | <b>10.36</b><br>( $\pm 1.01$ )       | <b>14.35</b><br>( $\pm 1.29$ ) | <b>10.48</b><br>( $\pm 0.95$ )       | <b>17.72</b><br>( $\pm 1.47$ ) |
| Soil moisture [% vol]                                                    | <b>52</b><br>( $\pm 3$ )            | <b>47</b><br>( $\pm 4$ )       | <b>45</b><br>( $\pm 5$ )             | <b>44</b><br>( $\pm 4$ )       | <b>44</b><br>( $\pm 19$ )            | <b>30</b><br>( $\pm 3$ )       |
| Soil temperature [°C]                                                    | <b>6.87</b><br>( $\pm 0.82$ )       | <b>4.53</b><br>( $\pm 0.45$ )  | <b>9.51</b><br>( $\pm 2.99$ )        | <b>6.16</b><br>( $\pm 1.54$ )  | <b>14.05</b><br>( $\pm 0.64$ )       | <b>7.15</b><br>( $\pm 0.76$ )  |
| Soil respiration [μmol CO <sub>2</sub> m <sup>-2</sup> s <sup>-1</sup> ] | <b>3.86</b><br>( $\pm 0.95$ )       | <b>1.44</b><br>( $\pm 0.15$ )  | <b>5.53</b><br>( $\pm 2.98$ )        | <b>1.65</b><br>( $\pm 0.32$ )  | <b>12.11</b><br>( $\pm 3.12$ )       | <b>1.93</b><br>( $\pm 0.61$ )  |
| Amoebae [10 <sup>4</sup> g <sup>-1</sup> ]                               | <b>23</b><br>( $\pm 22$ )           | <b>5.53</b><br>( $\pm 5.07$ )  | <b>47</b><br>( $\pm 57$ )            | <b>0.91</b><br>( $\pm 0.50$ )  | <b>10</b><br>( $\pm 15$ )            | <b>0.59</b><br>( $\pm 0.41$ )  |

---

Suppl. Table 1 continued

|                                       |                               |                               |                               |                               |                               |                               |
|---------------------------------------|-------------------------------|-------------------------------|-------------------------------|-------------------------------|-------------------------------|-------------------------------|
| Flagellates [ $10^4 \text{ g}^{-1}$ ] | <b>2.22</b><br>( $\pm 2.16$ ) | <b>5.51</b><br>( $\pm 2.54$ ) | <b>3.34</b><br>( $\pm 1.46$ ) | <b>1.43</b><br>( $\pm 0.78$ ) | <b>2.16</b><br>( $\pm 2.33$ ) | <b>1.62</b><br>( $\pm 0.50$ ) |
| Ciliates [ $10^2 \text{ g}^{-1}$ ]    | <b>1.97</b><br>( $\pm 3.01$ ) | <b>0.23</b><br>( $\pm 0.29$ ) | <b>0.54</b><br>( $\pm 0.75$ ) | <b>0.40</b><br>( $\pm 0.41$ ) | <b>5.12</b><br>( $\pm 0.78$ ) | <b>0.44</b><br>( $\pm 1.68$ ) |
| N° of vascular plant species          | <b>32</b><br>( $\pm 13$ )     | <b>34</b><br>( $\pm 18.89$ )  | <b>20</b><br>( $\pm 9$ )      | <b>32</b><br>( $\pm 15$ )     | <b>16</b><br>( $\pm 3$ )      | <b>14</b><br>( $\pm 10$ )     |
| Land use intensity                    | <b>2.64</b><br>( $\pm 1.96$ ) | <b>40</b><br>( $\pm 17$ )     | <b>3.67</b><br>( $\pm 1.58$ ) | <b>42</b><br>( $\pm 20$ )     | <b>2.70</b><br>( $\pm 2.16$ ) | <b>42</b><br>( $\pm 17$ )     |
| Ammonium [ $\mu\text{mol kg}^{-1}$ ]  | <b>7.92</b><br>( $\pm 6.22$ ) | <b>65</b><br>( $\pm 39$ )     | <b>8.88</b><br>( $\pm 3.91$ ) | <b>33</b><br>( $\pm 21$ )     | <b>9.44</b><br>( $\pm 7.38$ ) | <b>154</b><br>( $\pm 131$ )   |
| Nitrate [ $\mu\text{mol kg}^{-1}$ ]   | <b>637</b><br>( $\pm 549$ )   | <b>421</b><br>( $\pm 271$ )   | <b>595</b><br>( $\pm 241$ )   | <b>558</b><br>( $\pm 344$ )   | <b>807</b><br>( $\pm 374$ )   | <b>276</b><br>( $\pm 206$ )   |

---

1

2

- 1 **Supplementary Table 2.** GenBank *accession numbers* of the 2031 acidobacterial 16S rRNA  
2 gene sequences of pooled samples of all grassland plots of Schwäbische Alb (AEG), Hainich  
3 (HEG), Schorfheide-Chorin (SEG) or all forest plots of Schwäbische Alb (AEW), Hainich  
4 (HEW) and Schorfheide-Chorin (SEW) and sequenced DGGE bands.

|      | accession numbers   |
|------|---------------------|
| AEG  | HQ597043 - HQ597396 |
| HEG  | HQ597397 - HQ597542 |
|      | HQ597544 - HQ597731 |
|      | HQ597733 - HQ597739 |
|      | HQ597741            |
|      | HQ597743 - HQ597754 |
|      | HQ597756 - HQ597759 |
|      | HQ597761 - HQ597762 |
|      | HQ597764 - HQ597768 |
|      | HQ597771 - HQ597774 |
|      | HQ597776 - HQ597786 |
|      | HQ597788 - HQ597893 |
|      | HQ597796 - HQ597817 |
|      | HQ597819 - HQ597823 |
|      | HQ597825 - HQ597826 |
|      | HQ597829 - HQ597835 |
|      | HQ597837 - HQ597846 |
|      | HQ597848 - HQ597850 |
|      | HQ597852 - HQ597859 |
|      | HQ597864 - HQ597868 |
|      | HQ597870 - HQ597871 |
|      | HQ597873 - HQ597874 |
|      | HQ597876 - HQ597880 |
|      | HQ597882            |
|      | HQ597884 - HQ597886 |
|      | HQ597888 - HQ597889 |
| SEG  | HQ597893 - HQ597900 |
|      | HQ597902 - HQ597904 |
|      | HQ597906 - HQ597917 |
|      | HQ597920 - HQ597923 |
|      | HQ597925 - HQ597926 |
|      | HQ597930            |
|      | HQ597932            |
|      | HQ597934 - HQ597936 |
|      | HQ597939 - HQ597942 |
|      | HQ597944 - HQ597950 |
|      | HQ597952 - HQ597964 |
|      | HQ597967            |
|      | HQ597969            |
|      | HQ597972            |
|      | HQ597974            |
|      | HQ597977            |
|      | HQ597979 - HQ597980 |
|      | HQ597982            |
|      | HQ597984            |
|      | HQ597986            |
|      | HQ597988            |
|      | HQ597990 - HQ597991 |
|      | HQ597993            |
|      | HQ597996 - HQ597997 |
|      | HQ729774 - HQ729915 |
| AEW  | HQ598095 - HQ598414 |
| HEW  | HQ598415 - HQ598744 |
| SEW  | HQ598745 - HQ598871 |
|      | HQ598873 - HQ599092 |
| DGGE | HQ597998 - HQ598094 |

5  
6

1 **Supplementary Table 3.** Number of clones (OTUs), coverage and diversity indices of clone  
 2 libraries at the 3% dissimilarity level. Pooled samples of all grassland plots of Schwäbische  
 3 Alb (AEG), Hainich (HEG), Schorfheide-Chorin (SEG) or all forest plots of Schwäbische  
 4 Alb (AEW), Hainich (HEW) and Schorfheide-Chorin (SEW) have been used to generate  
 5 clone libraries.

|                                | <b>AEG</b>   | <b>HEG</b>   | <b>SEG</b>   | <b>AEW</b>   | <b>HEW</b>   | <b>SEW</b>  | <b>all</b>        |
|--------------------------------|--------------|--------------|--------------|--------------|--------------|-------------|-------------------|
| <b>Clones</b>                  | 355<br>(126) | 334<br>(121) | 345<br>(192) | 320<br>(124) | 330<br>(142) | 347<br>(75) | <b>2031 (414)</b> |
| <b>Gp1</b>                     | 6 (4)        | 4 (3)        | 16 (10)      | 83 (34)      | 106 (34)     | 295(48)     | <b>510 (66)</b>   |
| <b>Gp3</b>                     | 13 (7)       | 8 (5)        | 49 (35)      | 36 (17)      | 24 (14)      | 35 (16)     | <b>165 (66)</b>   |
| <b>Gp4</b>                     | 27 (13)      | 66 (27)      | 31 (20)      | 18 (8)       | 19 (12)      | -           | <b>161 (49)</b>   |
| <b>Gp5</b>                     | 60 (8)       | 35 (7)       | 10 (6)       | 43 (7)       | 41 (10)      | -           | <b>189 (16)</b>   |
| <b>Gp6</b>                     | 217 (82)     | 208 (70)     | 204 (99)     | 132 (51)     | 126 (60)     | 5 (5)       | <b>892 (172)</b>  |
| <b>Gp9</b>                     | -            | -            | 2 (1)        | -            | -            | -           | <b>2 (1)</b>      |
| <b>Gp11</b>                    | 3 (2)        | 3 (2)        | 12 (6)       | 1 (1)        | 1 (1)        | -           | <b>20 (8)</b>     |
| <b>Gp13</b>                    | -            | -            | -            | 1 (1)        | 5 (4)        | 8 (3)       | <b>14 (6)</b>     |
| <b>Gp15</b>                    | -            | -            | 1 (1)        | -            | 2 (2)        | 3 (2)       | <b>6 (4)</b>      |
| <b>Gp17</b>                    | 25 (9)       | 9 (6)        | 20 (14)      | 6 (5)        | 6 (5)        | 1 (1)       | <b>67 (25)</b>    |
| <b>Gp18</b>                    | 4 (1)        | 1 (1)        | -            | -            | -            | -           | <b>5 (1)</b>      |
| <b>Coverage (%)</b>            | 90.1         | 88.0         | 67.2         | 87.2         | 85.2         | 94.2        |                   |
| <b>Shannon</b>                 | 4.3          | 4.3          | 4.85         | 4.2          | 4.4          | 3.6         |                   |
| <b>Faith's PD</b> <sup>1</sup> | 2.95         | 2.85         | 4.78         | 3.07         | 3.48         | 1.86        |                   |
| <b>MPD</b> <sup>2</sup>        | 0.119        | 0.123        | 0.122        | 0.128        | 0.129        | 0.086       |                   |
| <b>MNTD</b> <sup>3</sup>       | 0.030        | 0.029        | 0.033        | 0.032        | 0.031        | 0.028       |                   |
| <b>NRI</b> <sup>4</sup>        | 2.53         | 2.74         | 4.50         | 1.59         | 1.91         | 5.66        |                   |
| <b>NTI</b> <sup>4</sup>        | 3.78         | 4.99         | 2.84         | 3.36         | 3.91         | 3.98        |                   |
| <b>Simpson</b> <sup>5</sup>    | 0.98         | 0.98         | 0.99         | 0.98         | 0.98         | 0.96        |                   |
| <b>pD</b> <sup>6</sup>         | 0.059        | 0.061        | 0.061        | 0.064        | 0.064        | 0.043       |                   |

6 <sup>1</sup> Faith's index of phylogenetic diversity

7 <sup>2</sup> Mean pairwise distance between all species in a community

8 <sup>3</sup> Mean nearest taxon distance – mean distance separating each species in the community  
 9 from its closest relative

10 <sup>4</sup> Net Relatedness Index/Nearest Taxon Index – measures of phylogenetic community  
 11 structure

12 <sup>5</sup> Simpson's diversity – probability that two individuals from the community belong to  
 13 different OTUs

14 <sup>6</sup> Phylogenetic Diversity – expected phylogenetic distance between to randomly selected  
 15 individuals from the community

1

2 **Supplementary Table 4.** Number of clones of OTUs with more than 20 sequences. *Acidobacteria* subgroup and dominant *in silico* T-RF of the  
3 respective OTU is given. Pooled samples of all grassland plots of Schwäbische Alb (AEG), Hainich (HEG), Schorfheide-Chorin (SEG) or all  
4 forest plots of Schwäbische Alb (AEW), Hainich (HEW) and Schorfheide-Chorin (SEW) have been used to generate clone libraries.

|                                | OTU3<br>Gp5          | OTU7<br>Gp1          | OTU3<br>1 Gp5        | OTU114<br>Gp1        | OTU9<br>Gp6          | OTU115<br>Gp6        | OTU6<br>Gp6          | OTU94<br>Gp1         | OTU32<br>Gp1         | OTU119<br>Gp1        | OTU92<br>Gp6         | OTU2<br>Gp1          | OTU15<br>Gp5         | OTU45<br>Gp6         | OTU99<br>Gp6         |
|--------------------------------|----------------------|----------------------|----------------------|----------------------|----------------------|----------------------|----------------------|----------------------|----------------------|----------------------|----------------------|----------------------|----------------------|----------------------|----------------------|
| <i>in silico</i> T-<br>RF (bp) | 135                  | 88                   | 135                  | 258/260              | 194                  | 193                  | 167, 194             | 88                   | 258                  | 258                  | 194                  | 143                  | 137                  | 285                  | 210                  |
| AEG                            | 23<br>(6.5%)         |                      | 15<br>(4.2%)         |                      | 9<br>(2.5%)          | 9<br>(2.5%)          | 16<br>(4.5%)         |                      |                      |                      | 7<br>(2.0%)          |                      | 7<br>(2.0%)          | 4<br>(1.1%)          | 7<br>(2.0%)          |
| HEG                            | 9<br>(2.7%)          |                      | 19<br>(5.7%)         |                      |                      | 16<br>(4.8%)         | 5<br>(1.5%)          |                      |                      |                      | 7<br>(2.1%)          |                      |                      | 8<br>(2.4%)          | 2<br>(0.6%)          |
| SEG                            | 1<br>(0.3%)          | 6<br>(1.7%)          | 4<br>(1.2%)          |                      |                      | 9<br>(2.6%)          | 1<br>(0.3%)          |                      |                      |                      | 7<br>(2.0%)          | 2<br>(0.6%)          |                      | 7<br>(2.0%)          | 10<br>(2.9%)         |
| AEW                            | 23<br>(7.2%)         | 13<br>(4.1%)         | 6<br>(1.9%)          | 1<br>(0.3%)          | 16<br>(4.1%)         | 1<br>(0.3)           | 6<br>(1.9%)          | 2<br>(0.6%)          | 3<br>(0.9%)          | 1<br>(0.3%)          | 3<br>(0.9%)          | 6<br>(1.9%)          | 9<br>(2.8%)          | 3<br>(0.9%)          | 1<br>(0.35)          |
| HEW                            | 16<br>(4.8%)         | 19<br>(5.8%)         | 6<br>(1.8%)          |                      | 12<br>(3.6%)         | 1<br>(0.3%)          | 4<br>(1.2%)          | 4<br>(1.2%)          | 5<br>(1.5%)          | 7<br>(2.1%)          | 2<br>(0.6%)          | 4<br>(1.2%)          | 7<br>(2.1%)          |                      | 2<br>(0.6%)          |
| SEW                            |                      | 24<br>(6.9%)         |                      | 41<br>(11.8%)        | 1<br>(0.3%)          |                      |                      | 25<br>(7.2%)         | 19<br>(5.5%)         | 18<br>(5.2%)         |                      | 11<br>(3.2%)         |                      |                      |                      |
| <b>Total</b>                   | <b>72<br/>(3.5%)</b> | <b>62<br/>(3.1%)</b> | <b>50<br/>(2.5%)</b> | <b>42<br/>(2.1%)</b> | <b>38<br/>(1.9%)</b> | <b>36<br/>(1.8%)</b> | <b>32<br/>(1.6%)</b> | <b>31<br/>(1.5%)</b> | <b>27<br/>(1.3%)</b> | <b>26<br/>(1.3%)</b> | <b>26<br/>(1.3%)</b> | <b>23<br/>(1.1%)</b> | <b>23<br/>(1.1%)</b> | <b>22<br/>(1.1%)</b> | <b>22<br/>(1.1%)</b> |

5

1

2 **Supplementary Table 5.** Collinearity among soil and site parameters as determined by Spearman's rank correlation coefficient rho.

3 Significantly correlated parameters show Spearman's rank correlation coefficient rho &gt; 0.6 and &gt; -0.6 in bold. Abbreviations: pH – pH, Corg –

4 organic carbon, N – nitrogen, CN – Corg/Nitrogen-ratio, SM – soil moisture, ST – soil temperature, SR – soil respiration, Am – abundance of

5 Amoebae, Fl – abundance of Flagellates, Ci – abundance of Ciliates, VP- number of vascular plant species, LUI – land use intensity, G –

6 grassland, F – forest, NH4 - ammonium, NO3 - nitrate, P – phosphorus.

|      | pH            | Corg          | N             | CN            | SM            | ST           | SR     | Am     | Fl           | Ci     | VP     | G      | LUI<br>F | NH4    | NO3           | P     |   |
|------|---------------|---------------|---------------|---------------|---------------|--------------|--------|--------|--------------|--------|--------|--------|----------|--------|---------------|-------|---|
| pH   | 1             |               |               |               |               |              |        |        |              |        |        |        |          |        |               |       |   |
| Corg | 0.556         | 1             |               |               |               |              |        |        |              |        |        |        |          |        |               |       |   |
| N    | <b>0.686</b>  | <b>0.957</b>  | 1             |               |               |              |        |        |              |        |        |        |          |        |               |       |   |
| CN   | <b>-0.840</b> | -0.467        | <b>-0.667</b> | 1             |               |              |        |        |              |        |        |        |          |        |               |       |   |
| SM   | 0.266         | 0.371         | 0.453         | -0.447        | 1             |              |        |        |              |        |        |        |          |        |               |       |   |
| ST   | 0.497         | 0.239         | 0.367         | -0.449        | -0.109        | 1            |        |        |              |        |        |        |          |        |               |       |   |
| SR   | <b>0.669</b>  | 0.481         | <b>0.631</b>  | <b>-0.670</b> | 0.158         | <b>0.801</b> | 1      |        |              |        |        |        |          |        |               |       |   |
| Am   | 0.539         | 0.438         | 0.577         | <b>-0.661</b> | 0.517         | 0.176        | 0.475  | 1      |              |        |        |        |          |        |               |       |   |
| Fl   | 0.088         | 0.206         | 0.166         | -0.084        | 0.252         | -0.229       | -0.097 | 0.479  | 1            |        |        |        |          |        |               |       |   |
| Ci   | 0.373         | 0.492         | 0.560         | -0.397        | 0.198         | 0.417        | 0.550  | 0.260  | -0.172       | 1      |        |        |          |        |               |       |   |
| VP   | -0.051        | 0.029         | -0.034        | 0.142         | 0.179         | -0.351       | -0.215 | 0.005  | 0.145        | -0.143 | 1      |        |          |        |               |       |   |
| LUI  | G             | -0.087        | 0.035         | 0.088         | -0.359        | 0.013        | -0.015 | 0.109  | 0.510        | 0.259  | -0.058 | -0.316 |          |        |               |       |   |
|      | F             | 0.176         | 0.064         | 0.112         | -0.081        | -0.073       | 0.061  | 0.020  | -0.112       | 0.026  | 0.109  | -0.196 | 1        |        |               |       |   |
| NH4  |               | <b>-0.765</b> | -0.387        | -0.552        | <b>0.745</b>  | -0.389       | -0.377 | -0.565 | -0.397       | 0.026  | -0.507 | 0.060  | -0.024   | -0.139 | 1             |       |   |
| NO3  |               | 0.342         | 0.499         | 0.557         | -0.420        | 0.296        | 0.182  | 0.307  | 0.352        | 0.115  | 0.181  | -0.168 | 0.281    | 0.231  | -0.272        | 1     |   |
| P    |               | <b>0.760</b>  | 0.597         | <b>0.718</b>  | <b>-0.807</b> | 0.291        | 0.310  | 0.562  | <b>0.650</b> | 0.282  | 0.303  | -0.040 | 0.424    | -0.203 | <b>-0.623</b> | 0.339 | 1 |

- 1 **Supplementary Table 6.** Results of *in silico* T-RF analysis (T-RF-cut-tool in ARB) of clone  
 2 sequence data. T-RFs in bold dominated in the respective subgroup. Assignments to *in vivo* T-  
 3 RFs were calculated from *in silico* T-RFs  $\pm$  3 bp.

| <i>Acidobacteria</i><br>subgroup | <i>in silico</i> T-RFs                                                         | <i>in vivo</i> abundant T-<br>RFs |
|----------------------------------|--------------------------------------------------------------------------------|-----------------------------------|
| 1                                | <b>88</b> , 143, 144, <b>258</b> , 260                                         | 85, 256                           |
| 3                                | 135, <b>141</b> , <b>143</b> , 145, 258                                        | 142                               |
| 4                                | 88, <b>138</b> , 139, 276                                                      | 139                               |
| 5                                | <b>135</b> , 137                                                               | 133                               |
| 6                                | 166, 167, <b>191</b> , <b>193</b> , <b>194</b> , 195, 210, <b>285</b> ,<br>287 | 189, 191, 283, 286                |
| 11                               | 462, 464                                                                       | 461                               |
| 13                               | 90, 166                                                                        | 87, 163                           |
| 15                               | 74                                                                             | 71                                |
| 17                               | <b>133</b> , 135, 137, 191, 193                                                | 130                               |
| 18                               | 200, 276                                                                       | 202, 275                          |



1 **Supplementary Figure 1:** PCA-Scatterplot of Bray-Curtis similarity measures of 16S rRNA  
2 gene T-RFLP and DGGE patterns for the 57 sites. ■ AEW, □ AEG, ▲ HEW, △ HEG, ◆ SEW,  
3 ◇ SEG. Naming corresponds to all grassland plots of Schwäbische Alb (AEG), Hainich  
4 (HEG), Schorfheide-Chorin (SEG) or all forest plots of Schwäbische Alb (AEW), Hainich  
5 (HEW) and Schorfheide-Chorin (SEW).

6

7 **Supplementary Figure 2.** RDA of 16S rRNA gene DGGE patterns of forest soils and 15  
8 environmental variables. N=30, RDA1=11%, RDA2=10%, 59% of total variation in the data  
9 can be explained by environmental variables. The longer the arrow and the smaller the angle  
10 to a significant axis, the more likely this variable influences the overall community  
11 composition. Abbreviations: pH – pH, Corg – organic carbon, N – nitrogen, CN – Corg/N-  
12 ratio, SM – soil moisture, ST – soil temperature, SR – soil respiration, Am – abundance of  
13 Amoebae, Fl – abundance of Flagellates, Ci – abundance of Ciliates, VP - number of vascular  
14 plant species, LUI – land use intensity, G – grassland, F – forest, NH4 - ammonium, NO3 -  
15 nitrate, P – phosphorus. RDA for grassland soils was not statistically significant.

16

1 **Supplementary Figure 1**

2

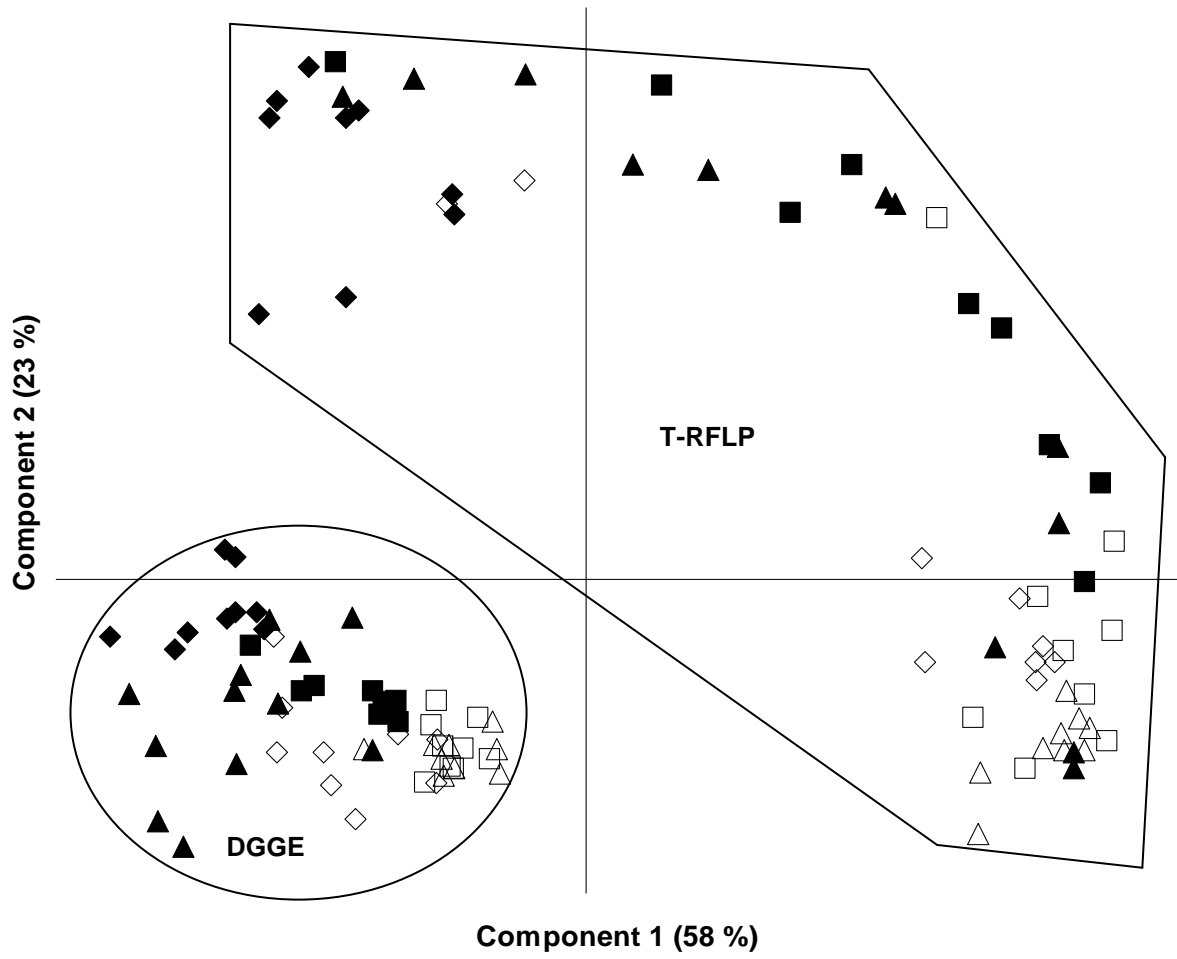

Supplementary Figure 2

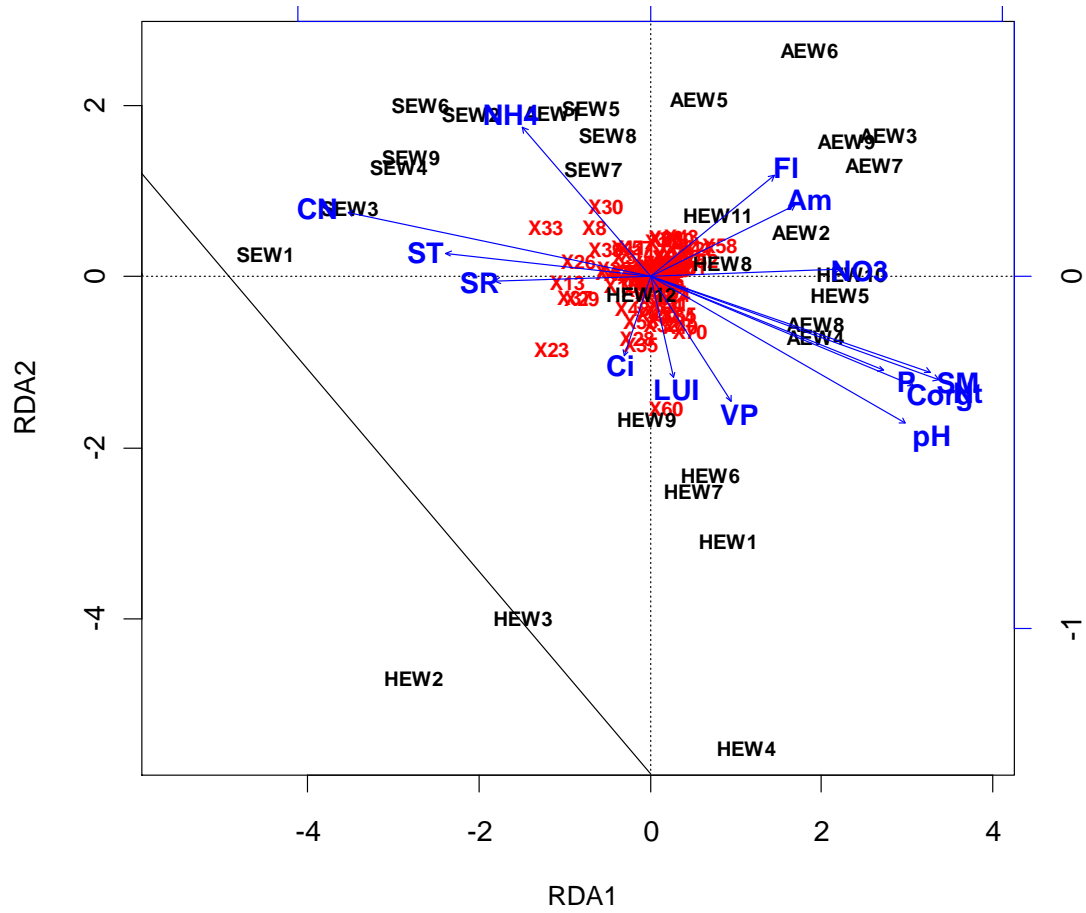

1  
2  
3  
4  
5  
6  
7  
8  
9  
10  
11  
12  
13  
14  
15  
16  
17  
18  
19  
20  
21  
22  
23  
24  
25  
26  
27  
28  
29  
30  
31  
32  
33  
34
